# Supplementary material for: Reference Intervals for Coagulation Parameters in Developmental Hemostasis from Infancy to Adolescence
Source: MDPI journal article supplement (doi:10.3390/diagnostics12102552), 2022-10-20

## Supplemental material

### Supplemental tables

Table S1. PT: Lower limit (LL, column 2) or upper limit (UL, column 5) of the reference intervals, with 90% confidence interval (columns 3 and 4 for LL and columns 6 and 7 for UL) for each subgroup investigated. d=days, m=months, y=years, F=females, M=males, N=number of subjects in that specific group after outlier exclusion.

| group    | LL   | 90% CI |      | UL   | 90% CI |      | N   |
|----------|------|--------|------|------|--------|------|-----|
| 0-15d    | 12.6 | 12.2   | 12.8 | 19.7 | 19.1   | 20.1 | 128 |
| F:0-15d  | 12.6 | 12.5   | 12.7 | 20.4 | 18.8   | 21.1 | 52  |
| M:0-15d  | 12.6 | 12.1   | 13.1 | 19.5 | 18.8   | 19.8 | 76  |
| 15-30d   | 12.0 | 11.4   | 12.3 | 16.0 | 15.4   | 16.4 | 129 |
| F:15-30d | 11.5 | 11.1   | 12.3 | 15.7 | 15.4   | 15.8 | 67  |
| M:15-30d | 12.4 | 12.3   | 12.5 | 16.1 | 15.1   | 16.4 | 61  |
| 1-6m     | 11.7 | 11.5   | 11.8 | 15.7 | 15.3   | 15.8 | 255 |
| F:1-6m   | 11.7 | 11.4   | 11.9 | 15.7 | 15.2   | 15.9 | 112 |
| M:1-6m   | 11.6 | 11.4   | 11.9 | 15.4 | 15.0   | 15.6 | 142 |
| 6-12m    | 11.8 | 11.6   | 12.0 | 14.9 | 14.6   | 15.0 | 140 |
| F:6-12m  | 11.8 | 11.7   | 12.1 | 14.8 | 14.5   | 15.0 | 61  |
| M:6-12m  | 11.5 | 11.2   | 11.9 | 14.9 | 14.5   | 15.0 | 80  |
| 1-16y    | 12.1 | 11.8   | 12.3 | 15.7 | 15.4   | 16.1 | 162 |
| F:1-16y  | 12.1 | 11.9   | 12.5 | 15.8 | 15.3   | 16.1 | 74  |
| M:1-16y  | 12.0 | 11.5   | 12.4 | 15.7 | 15.3   | 16.1 | 88  |
| F        | 11.9 | 11.7   | 12.0 | 16.3 | 16.1   | 16.4 | 363 |
| M        | 11.8 | 11.6   | 12.0 | 16.4 | 16.1   | 16.6 | 435 |
| all      | 11.8 | 11.7   | 11.9 | 16.3 | 16.2   | 16.5 | 799 |

Table S2. PT ratio: Lower limit (LL, column 2) or upper limit (UL, column 5) of the reference intervals, with 90% confidence interval (columns 3 and 4 for LL and columns 6 and 7 for UL) for each subgroup investigated. d=days, m=months, y=years, F=females, M=males, N=number of subjects in that specific group after outlier exclusion.

| group    | LL   | 90% CI |      | UL   | 90% CI |      | N   |
|----------|------|--------|------|------|--------|------|-----|
| 0-15d    | 0.92 | 0.90   | 0.94 | 1.45 | 1.40   | 1.48 | 128 |
| F:0-15d  | 0.92 | 0.92   | 0.94 | 1.50 | 1.38   | 1.56 | 52  |
| M:0-15d  | 0.92 | 0.89   | 0.96 | 1.43 | 1.38   | 1.45 | 76  |
| 15-30d   | 0.88 | 0.84   | 0.90 | 1.18 | 1.14   | 1.21 | 129 |
| F:15-30d | 0.85 | 0.82   | 0.90 | 1.15 | 1.13   | 1.16 | 67  |
| M:15-30d | 0.91 | 0.91   | 0.92 | 1.18 | 1.11   | 1.21 | 61  |
| 1-6m     | 0.86 | 0.85   | 0.87 | 1.15 | 1.12   | 1.16 | 255 |
| F:1-6m   | 0.86 | 0.84   | 0.87 | 1.16 | 1.12   | 1.17 | 112 |
| M:1-6m   | 0.86 | 0.84   | 0.87 | 1.13 | 1.10   | 1.15 | 142 |
| 6-12m    | 0.86 | 0.86   | 0.88 | 1.09 | 1.07   | 1.10 | 140 |
| F:6-12m  | 0.87 | 0.86   | 0.89 | 1.09 | 1.07   | 1.10 | 61  |
| M:6-12m  | 0.85 | 0.82   | 0.88 | 1.09 | 1.07   | 1.10 | 80  |
| 1-16y    | 0.89 | 0.87   | 0.91 | 1.16 | 1.13   | 1.18 | 162 |
| F:1-16y  | 0.89 | 0.88   | 0.92 | 1.16 | 1.13   | 1.18 | 74  |
| M:1-16y  | 0.88 | 0.85   | 0.91 | 1.16 | 1.12   | 1.19 | 88  |
| F        | 0.87 | 0.86   | 0.88 | 1.19 | 1.18   | 1.20 | 362 |
| M        | 0.87 | 0.86   | 0.88 | 1.21 | 1.18   | 1.22 | 435 |
| all      | 0.87 | 0.86   | 0.88 | 1.20 | 1.19   | 1.21 | 799 |

Table S3. aPTT: Lower limit (LL, column 2) or upper limit (UL, column 5) of the reference intervals, with 90% confidence interval (columns 3 and 4 for LL and columns 6 and 7 for UL) for each subgroup investigated. d=days, m=months, y=years, F=females, M=males, N=number of subjects in that specific group after outlier exclusion.

| group    | LL   | 90% CI |      | UL   | 90% CI |      | N   |
|----------|------|--------|------|------|--------|------|-----|
| 0-15d    | 28.8 | 26.2   | 30.1 | 47.8 | 46.3   | 48.6 | 124 |
| F:0-15d  | 28.5 | 27.9   | 30.3 | 43.5 | 42.0   | 43.8 | 47  |
| M:0-15d  | 28.2 | 25.1   | 30.6 | 48.1 | 46.5   | 49.0 | 75  |
| 15-30d   | 28.0 | 27.5   | 29.1 | 39.7 | 38.6   | 40.7 | 121 |
| F:15-30d | 28.1 | 27.7   | 29.4 | 39.5 | 38.3   | 40.1 | 62  |
| M:15-30d | 28.0 | 27.5   | 29.8 | 39.1 | 37.9   | 39.8 | 58  |
| 1-6m     | 26.3 | 25.6   | 27.1 | 39.4 | 38.5   | 40.0 | 240 |
| F:1-6m   | 25.8 | 25.1   | 27.2 | 38.7 | 37.3   | 39.4 | 102 |
| M:1-6m   | 26.5 | 26.0   | 27.4 | 38.6 | 37.5   | 39.0 | 134 |
| 6-12m    | 25.1 | 24.1   | 25.9 | 37.1 | 35.7   | 37.9 | 140 |
| F:6-12m  | 24.9 | 24.3   | 26.0 | 36.2 | 34.6   | 37.1 | 61  |
| M:6-12m  | 25.8 | 25.4   | 26.5 | 37.6 | 35.5   | 38.2 | 78  |
| 1-16y    | 26.0 | 25.2   | 27.3 | 37.2 | 36.2   | 38.1 | 154 |
| F:1-16y  | 27.2 | 26.5   | 28.4 | 36.6 | 35.6   | 37.4 | 73  |
| M:1-16y  | 25.6 | 24.9   | 27.2 | 37.8 | 36.2   | 38.5 | 80  |
| F        | 25.9 | 25.2   | 26.7 | 39.8 | 38.9   | 40.3 | 347 |
| M        | 26.1 | 25.7   | 26.6 | 40.5 | 39.7   | 40.9 | 423 |
| all      | 26.0 | 25.6   | 26.5 | 40.2 | 39.6   | 40.6 | 770 |

Table S4. aPTT ratio: Lower limit (LL, column 2) or upper limit (UL, column 5) of the reference intervals, with 90% confidence interval (columns 3 and 4 for LL and columns 6 and 7 for UL) for each subgroup investigated. d=days, m=months, y=years, F=females, M=males, N=number of subjects in that specific group after outlier exclusion.

| group    | LL   | 90% CI |      | UL   | 90% CI |      | N   |
|----------|------|--------|------|------|--------|------|-----|
| 0-15d    | 0.89 | 0.81   | 0.93 | 1.47 | 1.43   | 1.50 | 124 |
| F:0-15d  | 0.88 | 0.86   | 0.93 | 1.34 | 1.29   | 1.35 | 47  |
| M:0-15d  | 0.87 | 0.77   | 0.94 | 1.48 | 1.43   | 1.51 | 75  |
| 15-30d   | 0.86 | 0.85   | 0.90 | 1.22 | 1.19   | 1.25 | 121 |
| F:15-30d | 0.87 | 0.85   | 0.90 | 1.21 | 1.17   | 1.23 | 62  |
| M:15-30d | 0.86 | 0.84   | 0.92 | 1.20 | 1.17   | 1.22 | 58  |
| 1-6m     | 0.81 | 0.79   | 0.83 | 1.21 | 1.18   | 1.23 | 240 |
| F:1-6m   | 0.79 | 0.77   | 0.83 | 1.19 | 1.15   | 1.21 | 102 |
| M:1-6m   | 0.81 | 0.80   | 0.84 | 1.19 | 1.15   | 1.20 | 134 |
| 6-12m    | 0.77 | 0.74   | 0.80 | 1.14 | 1.10   | 1.17 | 140 |
| F:6-12m  | 0.77 | 0.75   | 0.80 | 1.12 | 1.06   | 1.14 | 61  |
| M:6-12m  | 0.79 | 0.78   | 0.81 | 1.16 | 1.10   | 1.17 | 78  |
| 1-16y    | 0.80 | 0.77   | 0.84 | 1.15 | 1.11   | 1.17 | 154 |
| F:1-16y  | 0.84 | 0.82   | 0.87 | 1.13 | 1.10   | 1.15 | 73  |
| M:1-16y  | 0.79 | 0.77   | 0.84 | 1.16 | 1.12   | 1.19 | 80  |
| F        | 0.80 | 0.78   | 0.82 | 1.23 | 1.20   | 1.24 | 347 |
| M        | 0.80 | 0.79   | 0.82 | 1.25 | 1.22   | 1.26 | 423 |
| all      | 0.80 | 0.79   | 0.81 | 1.24 | 1.22   | 1.25 | 770 |

Table S5. Fibrinogen: Lower limit (LL, column 2) or upper limit (UL, column 5) of the reference intervals, with 90% confidence interval (columns 3 and 4 for LL and columns 6 and 7 for UL) for each subgroup investigated. d=days, m=months, y=years, F=females, M=males, N=number of subjects in that specific group after outlier exclusion.

| group    | LL  | 90% CI |     | UL  | 90% CI |     | N   |
|----------|-----|--------|-----|-----|--------|-----|-----|
| 0-15d    | 161 | 142    | 180 | 481 | 454    | 514 | 122 |
| F:0-15d  | 159 | 156    | 182 | 492 | 459    | 511 | 48  |
| M:0-15d  | 167 | 139    | 194 | 440 | 420    | 455 | 73  |
| 15-30d   | 200 | 173    | 210 | 473 | 438    | 492 | 124 |
| F:15-30d | 206 | 203    | 220 | 481 | 435    | 497 | 64  |
| M:15-30d | 181 | 154    | 211 | 464 | 423    | 488 | 60  |
| 1-6m     | 194 | 185    | 200 | 566 | 536    | 584 | 245 |
| F:1-6m   | 191 | 182    | 200 | 567 | 532    | 585 | 110 |
| M:1-6m   | 195 | 179    | 208 | 548 | 506    | 576 | 134 |
| 6-12m    | 175 | 161    | 195 | 463 | 440    | 482 | 136 |
| F:6-12m  | 181 | 171    | 210 | 464 | 434    | 489 | 60  |
| M:6-12m  | 169 | 156    | 197 | 484 | 443    | 508 | 77  |
| 1-16y    | 194 | 184    | 212 | 463 | 443    | 476 | 145 |
| F:1-16y  | 206 | 189    | 241 | 483 | 444    | 508 | 68  |
| M:1-16y  | 189 | 179    | 209 | 465 | 439    | 479 | 78  |
| F        | 186 | 174    | 197 | 517 | 496    | 531 | 351 |
| M        | 186 | 175    | 195 | 485 | 467    | 497 | 419 |
| all      | 187 | 178    | 195 | 501 | 486    | 513 | 771 |

Table S6. Thrombin time: Lower limit (LL, column 2) or upper limit (UL, column 5) of the reference intervals, with 90% confidence interval (columns 3 and 4 for LL and columns 6 and 7 for UL) for each subgroup investigated. d=days, m=months, y=years, F=females, M=males, N=number of subjects in that specific group after outlier exclusion.

| group    | LL | 90% CI |    | UL | 90% CI |    | N   |
|----------|----|--------|----|----|--------|----|-----|
| 0-15d    | 14 | 14     | 15 | 21 | 20     | 21 | 117 |
| F:0-15d  | 15 | 15     | 16 | 20 | 19     | 20 | 42  |
| M:0-15d  | 14 | 14     | 15 | 21 | 21     | 22 | 73  |
| 15-30d   | 15 | 15     | 15 | 19 | 18     | 19 | 115 |
| F:15-30d | 15 | 15     | 16 | 18 | 18     | 19 | 57  |
| M:15-30d | 16 | 15     | 16 | 19 | 19     | 19 | 56  |
| 1-6m     | 14 | 14     | 14 | 18 | 18     | 19 | 158 |
| F:1-6m   | 14 | 14     | 14 | 18 | 18     | 19 | 95  |
| M:1-6m   | 14 | 14     | 15 | 19 | 18     | 19 | 64  |
| 6-12m    | 14 | 13     | 14 | 19 | 18     | 19 | 89  |
| F:6-12m  | 14 | 13     | 14 | 19 | 18     | 19 | 58  |
| M:6-12m  | 14 | 14     | 15 | 19 | 18     | 19 | 31  |
| 1-16y    | 15 | 15     | 15 | 17 | 17     | 17 | 97  |
| F:1-16y  | 15 | 15     | 15 | 17 | 17     | 17 | 48  |
| M:1-16y  | 15 | 15     | 15 | 17 | 17     | 17 | 47  |
| F        | 14 | 14     | 15 | 19 | 18     | 19 | 298 |
| M        | 14 | 14     | 15 | 19 | 19     | 19 | 267 |
| all      | 14 | 14     | 15 | 19 | 19     | 19 | 564 |

Table S7. D-Dimer: Lower limit (LL, column 2) or upper limit (UL, column 5) of the reference intervals, with 90% confidence interval (columns 3 and 4 for LL and columns 6 and 7 for UL) for each subgroup investigated. d=days, m=months, y=years, F=females, M=males, N=number of subjects in that specific group after outlier exclusion.

| group    | LL   | 90% CI |      | UL   | 90% CI |      | N   |
|----------|------|--------|------|------|--------|------|-----|
| 0-15d    | 0.29 | 0.27   | 0.41 | 1.87 | 1.71   | 1.93 | 78  |
| F:0-15d  | 0.34 | 0.30   | 0.50 | 1.88 | 1.57   | 1.91 | 28  |
| M:0-15d  | 0.28 | 0.27   | 0.38 | 1.84 | 1.60   | 1.93 | 50  |
| 15-30d   | 0.27 | 0.27   | 0.30 | 1.12 | 1.00   | 1.24 | 114 |
| F:15-30d | 0.28 | 0.27   | 0.34 | 1.04 | 0.94   | 1.10 | 59  |
| M:15-30d | 0.27 | 0.27   | 0.32 | 1.31 | 1.14   | 1.34 | 57  |
| 1-6m     | 0.27 | 0.27   | 0.27 | 0.85 | 0.79   | 0.88 | 111 |
| F:1-6m   | 0.27 | 0.27   | 0.27 | 0.83 | 0.74   | 0.85 | 56  |
| M:1-6m   | 0.27 | 0.27   | 0.28 | 0.93 | 0.77   | 1.00 | 55  |
| 6-12m    | 0.24 | 0.21   | 0.27 | 0.86 | 0.82   | 0.88 | 67  |
| F:6-12m  | 0.27 | 0.27   | 0.27 | 0.87 | 0.83   | 0.89 | 50  |
| M:6-12m  | 0.21 | 0.20   | 0.28 | 0.65 | 0.56   | 0.66 | 17  |
| 1-16y    | 0.27 | 0.27   | 0.27 | 0.54 | 0.52   | 0.56 | 115 |
| F:1-16y  | 0.27 | 0.27   | 0.27 | 0.60 | 0.53   | 0.63 | 55  |
| M:1-16y  | 0.27 | 0.27   | 0.27 | 0.52 | 0.48   | 0.52 | 61  |
| F        | 0.27 | 0.27   | 0.27 | 1.09 | 0.97   | 1.18 | 246 |
| M        | 0.27 | 0.26   | 0.27 | 1.39 | 1.31   | 1.43 | 245 |
| all      | 0.27 | 0.27   | 0.27 | 1.21 | 1.12   | 1.26 | 483 |

Table S8. Factor II: Lower limit (LL, column 2) or upper limit (UL, column 5) of the reference intervals, with 90% confidence interval (columns 3 and 4 for LL and columns 6 and 7 for UL) for each subgroup investigated. d=days, m=months, y=years, F=females, M=males, N=number of subjects in that specific group after outlier exclusion.

| group    | LL | 90% CI |    | UL  | 90% CI |     | N   |
|----------|----|--------|----|-----|--------|-----|-----|
| 0-15d    | 21 | 17     | 28 | 88  | 81     | 91  | 88  |
| F:0-15d  | 17 | 16     | 28 | 88  | 75     | 92  | 35  |
| M:0-15d  | 26 | 24     | 31 | 70  | 62     | 73  | 47  |
| 15-30d   | 45 | 44     | 49 | 88  | 82     | 90  | 37  |
| F:15-30d | 59 | 59     | 62 | 89  | 79     | 90  | 13  |
| M:15-30d | 45 | 44     | 49 | 83  | 79     | 83  | 24  |
| 1-6m     | 46 | 43     | 50 | 103 | 100    | 107 | 130 |
| F:1-6m   | 49 | 48     | 54 | 103 | 99     | 105 | 59  |
| M:1-6m   | 44 | 42     | 49 | 109 | 98     | 114 | 72  |
| 6-12m    | 62 | 61     | 66 | 123 | 114    | 126 | 68  |
| F:6-12m  | 62 | 62     | 68 | 113 | 108    | 114 | 25  |
| M:6-12m  | 63 | 61     | 70 | 118 | 107    | 120 | 41  |
| 1-16y    | 72 | 69     | 76 | 124 | 120    | 129 | 123 |
| F:1-16y  | 71 | 67     | 78 | 123 | 117    | 124 | 57  |
| M:1-16y  | 72 | 70     | 77 | 127 | 119    | 132 | 66  |
| F        | 38 | 33     | 44 | 122 | 116    | 129 | 191 |
| M        | 32 | 29     | 37 | 123 | 117    | 130 | 261 |
| all      | 33 | 29     | 37 | 122 | 117    | 125 | 453 |



Table S9: Factor V: Lower limit (LL, column 2) or upper limit (UL, column 5) of the reference intervals, with 90% confidence interval (columns 3 and 4 for LL and columns 6 and 7 for UL) for each subgroup investigated. d=days, m=months, y=years, F=females, M=males, N=number of subjects in that specific group after outlier exclusion.

| group    | LL | 90% CI |    | UL  | 90% CI |     | N   |
|----------|----|--------|----|-----|--------|-----|-----|
| 0-15d    | 42 | 38     | 50 | 166 | 156    | 169 | 87  |
| F:0-15d  | 42 | 40     | 59 | 172 | 150    | 179 | 35  |
| M:0-15d  | 43 | 38     | 51 | 128 | 117    | 131 | 48  |
| 15-30d   | 58 | 52     | 83 | 196 | 176    | 201 | 37  |
| F:15-30d | 85 | 84     | 99 | 199 | 149    | 202 | 13  |
| M:15-30d | 55 | 51     | 83 | 187 | 161    | 189 | 24  |
| 1-6m     | 67 | 63     | 75 | 183 | 174    | 190 | 132 |
| F:1-6m   | 73 | 64     | 88 | 189 | 175    | 195 | 60  |
| M:1-6m   | 65 | 63     | 74 | 179 | 168    | 186 | 72  |
| 6-12m    | 78 | 71     | 88 | 181 | 169    | 189 | 66  |
| F:6-12m  | 72 | 69     | 94 | 178 | 168    | 180 | 24  |
| M:6-12m  | 84 | 82     | 92 | 167 | 146    | 171 | 41  |
| 1-16y    | 77 | 73     | 81 | 157 | 146    | 165 | 122 |
| F:1-16y  | 77 | 72     | 87 | 157 | 137    | 165 | 57  |
| M:1-16y  | 76 | 72     | 81 | 157 | 145    | 164 | 65  |
| F        | 60 | 49     | 67 | 176 | 170    | 180 | 187 |
| M        | 54 | 51     | 61 | 175 | 170    | 183 | 258 |
| all      | 57 | 52     | 62 | 175 | 171    | 180 | 445 |

Table S10: Factor VII: Lower limit (LL, column 2) or upper limit (UL, column 5) of the reference intervals, with 90% confidence interval (columns 3 and 4 for LL and columns 6 and 7 for UL) for each subgroup investigated. d=days, m=months, y=years, F=females, M=males, N=number of subjects in that specific group after outlier exclusion.

| group    | LL | 90% CI |    | UL  | 90% CI |     | N   |
|----------|----|--------|----|-----|--------|-----|-----|
| 0-15d    | 24 | 21     | 31 | 100 | 92     | 107 | 85  |
| F:0-15d  | 23 | 20     | 33 | 114 | 99     | 117 | 35  |
| M:0-15d  | 26 | 22     | 33 | 84  | 78     | 85  | 51  |
| 15-30d   | 31 | 27     | 47 | 150 | 125    | 157 | 39  |
| F:15-30d | 54 | 53     | 68 | 141 | 118    | 142 | 13  |
| M:15-30d | 29 | 26     | 45 | 150 | 116    | 157 | 26  |
| 1-6m     | 43 | 37     | 49 | 141 | 137    | 150 | 133 |
| F:1-6m   | 48 | 46     | 55 | 141 | 133    | 143 | 61  |
| M:1-6m   | 38 | 32     | 48 | 145 | 136    | 156 | 72  |
| 6-12m    | 50 | 47     | 61 | 140 | 133    | 142 | 70  |
| F:6-12m  | 36 | 34     | 55 | 136 | 130    | 138 | 28  |
| M:6-12m  | 68 | 65     | 76 | 141 | 132    | 143 | 42  |
| 1-16y    | 54 | 50     | 62 | 137 | 129    | 140 | 125 |
| F:1-16y  | 57 | 51     | 66 | 124 | 117    | 127 | 57  |
| M:1-16y  | 52 | 50     | 62 | 139 | 133    | 141 | 68  |
| F        | 35 | 29     | 42 | 140 | 133    | 147 | 196 |
| M        | 34 | 31     | 38 | 141 | 137    | 149 | 265 |
| all      | 35 | 31     | 39 | 140 | 136    | 142 | 460 |

Table S11: Factor X: Lower limit (LL, column 2) or upper limit (UL, column 5) of the reference intervals, with 90% confidence interval (columns 3 and 4 for LL and columns 6 and 7 for UL) for each subgroup investigated. d=days, m=months, y=years, F=females, M=males, N=number of subjects in that specific group after outlier exclusion.

| group    | LL | 90% CI |    | UL  | 90% CI |     | N   |
|----------|----|--------|----|-----|--------|-----|-----|
| 0-15d    | 21 | 15     | 28 | 87  | 78     | 93  | 83  |
| F:0-15d  | 16 | 13     | 27 | 80  | 70     | 83  | 33  |
| M:0-15d  | 26 | 23     | 31 | 88  | 75     | 94  | 49  |
| 15-30d   | 38 | 34     | 50 | 112 | 99     | 114 | 38  |
| F:15-30d | 53 | 52     | 69 | 114 | 96     | 114 | 13  |
| M:15-30d | 36 | 33     | 50 | 101 | 88     | 104 | 25  |
| 1-6m     | 51 | 48     | 55 | 115 | 108    | 120 | 124 |
| F:1-6m   | 58 | 57     | 62 | 123 | 109    | 128 | 58  |
| M:1-6m   | 49 | 47     | 53 | 105 | 96     | 107 | 65  |
| 6-12m    | 63 | 60     | 68 | 134 | 127    | 136 | 70  |
| F:6-12m  | 65 | 64     | 73 | 119 | 109    | 121 | 25  |
| M:6-12m  | 62 | 59     | 69 | 135 | 126    | 137 | 44  |
| 1-16y    | 62 | 58     | 68 | 119 | 114    | 123 | 121 |
| F:1-16y  | 65 | 62     | 71 | 116 | 109    | 117 | 56  |
| M:1-16y  | 60 | 57     | 69 | 118 | 113    | 120 | 64  |
| F        | 37 | 35     | 41 | 124 | 116    | 130 | 186 |
| M        | 33 | 31     | 35 | 131 | 125    | 136 | 259 |
| all      | 34 | 31     | 36 | 130 | 125    | 134 | 449 |

Table S12: Factor VIII: Lower limit (LL, column 2) or upper limit (UL, column 5) of the reference intervals, with 90% confidence interval (columns 3 and 4 for LL and columns 6 and 7 for UL) for each subgroup investigated. d=days, m=months, y=years, F=females, M=males, N=number of subjects in that specific group after outlier exclusion.

| group    | LL | 90% CI |     | UL  | 90% CI |     | N   |
|----------|----|--------|-----|-----|--------|-----|-----|
| 0-15d    | 68 | 66     | 79  | 282 | 244    | 296 | 66  |
| F:0-15d  | 71 | 67     | 96  | 247 | 221    | 250 | 27  |
| M:0-15d  | 68 | 66     | 79  | 291 | 240    | 298 | 39  |
| 15-30d   | 74 | 73     | 86  | 218 | 193    | 220 | 29  |
| F:15-30d | 86 | 85     | 103 | 159 | 151    | 159 | 9   |
| M:15-30d | 74 | 72     | 88  | 219 | 199    | 221 | 20  |
| 1-6m     | 64 | 57     | 73  | 235 | 217    | 250 | 123 |
| F:1-6m   | 57 | 53     | 70  | 218 | 197    | 224 | 56  |
| M:1-6m   | 74 | 72     | 78  | 246 | 216    | 253 | 67  |
| 6-12m    | 74 | 72     | 81  | 204 | 180    | 212 | 53  |
| F:6-12m  | 73 | 72     | 83  | 193 | 155    | 200 | 23  |
| M:6-12m  | 76 | 75     | 90  | 187 | 168    | 192 | 29  |
| 1-16y    | 66 | 63     | 72  | 207 | 183    | 224 | 107 |
| F:1-16y  | 64 | 62     | 74  | 179 | 169    | 181 | 46  |
| M:1-16y  | 68 | 66     | 74  | 216 | 181    | 228 | 60  |
| F        | 64 | 58     | 70  | 223 | 209    | 231 | 163 |
| M        | 71 | 68     | 74  | 231 | 218    | 241 | 212 |
| all      | 68 | 65     | 72  | 225 | 217    | 232 | 374 |

Table S13: Factor IX: Lower limit (LL, column 2) or upper limit (UL, column 5) of the reference intervals, with 90% confidence interval (columns 3 and 4 for LL and columns 6 and 7 for UL) for each subgroup investigated. d=days, m=months, y=years, F=females, M=males, N=number of subjects in that specific group after outlier exclusion.

| group    | LL | 90% CI |    | UL  | 90% CI |     | N   |
|----------|----|--------|----|-----|--------|-----|-----|
| 0-15d    | 15 | 13     | 20 | 87  | 76     | 94  | 85  |
| F:0-15d  | 16 | 15     | 23 | 78  | 69     | 80  | 34  |
| M:0-15d  | 15 | 13     | 23 | 96  | 80     | 100 | 52  |
| 15-30d   | 32 | 31     | 40 | 95  | 85     | 97  | 37  |
| F:15-30d | 45 | 45     | 52 | 110 | 84     | 112 | 12  |
| M:15-30d | 32 | 31     | 40 | 82  | 67     | 84  | 24  |
| 1-6m     | 36 | 32     | 41 | 110 | 105    | 112 | 131 |
| F:1-6m   | 36 | 33     | 44 | 108 | 98     | 109 | 58  |
| M:1-6m   | 35 | 30     | 40 | 107 | 99     | 111 | 71  |
| 6-12m    | 45 | 34     | 58 | 143 | 137    | 145 | 66  |
| F:6-12m  | 54 | 53     | 62 | 129 | 107    | 134 | 25  |
| M:6-12m  | 40 | 32     | 59 | 141 | 132    | 143 | 39  |
| 1-16y    | 60 | 58     | 62 | 123 | 117    | 127 | 124 |
| F:1-16y  | 60 | 58     | 65 | 120 | 108    | 125 | 56  |
| M:1-16y  | 59 | 58     | 62 | 125 | 117    | 128 | 68  |
| F        | 24 | 19     | 33 | 123 | 114    | 131 | 190 |
| M        | 26 | 22     | 30 | 127 | 119    | 134 | 260 |
| all      | 25 | 22     | 29 | 127 | 120    | 132 | 451 |

Table S14: Factor XI: Lower limit (LL, column 2) or upper limit (UL, column 5) of the reference intervals, with 90% confidence interval (columns 3 and 4 for LL and columns 6 and 7 for UL) for each subgroup investigated. d=days, m=months, y=years, F=females, M=males, N=number of subjects in that specific group after outlier exclusion.

| group    | LL | 90% CI |    | UL  | 90% CI |     | N   |
|----------|----|--------|----|-----|--------|-----|-----|
| 0-15d    | 14 | 11     | 21 | 86  | 76     | 93  | 83  |
| F:0-15d  | 14 | 10     | 25 | 85  | 77     | 88  | 34  |
| M:0-15d  | 15 | 13     | 21 | 69  | 65     | 69  | 48  |
| 15-30d   | 36 | 33     | 46 | 92  | 82     | 95  | 32  |
| F:15-30d | 55 | 55     | 61 | 105 | 83     | 107 | 11  |
| M:15-30d | 43 | 42     | 47 | 69  | 63     | 69  | 19  |
| 1-6m     | 41 | 39     | 44 | 111 | 103    | 114 | 127 |
| F:1-6m   | 49 | 47     | 53 | 110 | 102    | 112 | 54  |
| M:1-6m   | 40 | 38     | 43 | 107 | 99     | 114 | 69  |
| 6-12m    | 68 | 64     | 74 | 149 | 136    | 150 | 60  |
| F:6-12m  | 72 | 72     | 79 | 130 | 116    | 132 | 20  |
| M:6-12m  | 73 | 72     | 77 | 126 | 116    | 130 | 35  |
| 1-16y    | 78 | 69     | 82 | 164 | 157    | 167 | 118 |
| F:1-16y  | 81 | 79     | 87 | 173 | 163    | 177 | 57  |
| M:1-16y  | 72 | 63     | 82 | 149 | 143    | 152 | 61  |
| F        | 31 | 26     | 40 | 155 | 151    | 157 | 183 |
| M        | 26 | 20     | 31 | 154 | 143    | 163 | 248 |
| all      | 27 | 23     | 31 | 157 | 152    | 163 | 435 |

Table S15: Factor XII: Lower limit (LL, column 2) or upper limit (UL, column 5) of the reference intervals, with 90% confidence interval (columns 3 and 4 for LL and columns 6 and 7 for UL) for each subgroup investigated. d=days, m=months, y=years, F=females, M=males, N=number of subjects in that specific group after outlier exclusion.

| group    | LL | 90% CI |    | UL  | 90% CI |     | N   |
|----------|----|--------|----|-----|--------|-----|-----|
| 0-15d    | 21 | 19     | 26 | 89  | 77     | 94  | 83  |
| F:0-15d  | 20 | 18     | 30 | 85  | 67     | 89  | 32  |
| M:0-15d  | 24 | 23     | 27 | 83  | 71     | 86  | 50  |
| 15-30d   | 20 | 15     | 37 | 109 | 84     | 118 | 32  |
| F:15-30d | 47 | 46     | 62 | 81  | 78     | 81  | 9   |
| M:15-30d | 18 | 14     | 40 | 113 | 84     | 119 | 22  |
| 1-6m     | 29 | 22     | 41 | 128 | 121    | 138 | 128 |
| F:1-6m   | 45 | 44     | 52 | 133 | 119    | 144 | 58  |
| M:1-6m   | 25 | 20     | 40 | 122 | 112    | 124 | 68  |
| 6-12m    | 52 | 46     | 69 | 143 | 131    | 151 | 60  |
| F:6-12m  | 46 | 44     | 69 | 130 | 126    | 130 | 19  |
| M:6-12m  | 65 | 62     | 77 | 147 | 132    | 152 | 41  |
| 1-16y    | 67 | 62     | 73 | 147 | 139    | 156 | 116 |
| F:1-16y  | 73 | 71     | 80 | 151 | 137    | 161 | 55  |
| M:1-16y  | 60 | 57     | 69 | 146 | 135    | 151 | 62  |
| F        | 29 | 23     | 35 | 138 | 131    | 146 | 181 |
| M        | 26 | 22     | 30 | 139 | 133    | 147 | 248 |
| all      | 27 | 24     | 31 | 138 | 133    | 143 | 429 |

Table S16: Factor XIII: Lower limit (LL, column 2) or upper limit (UL, column 5) of the reference intervals, with 90% confidence interval (columns 3 and 4 for LL and columns 6 and 7 for UL) for each subgroup investigated. d=days, m=months, y=years, F=females, M=males, N=number of subjects in that specific group after outlier exclusion.

| id       | LL | 90% CI |     | UL  | 90% CI |     | N  |
|----------|----|--------|-----|-----|--------|-----|----|
| 0-15d    | ND | ND     | ND  | ND  | ND     | ND  | ND |
| F:0-15d  | ND | ND     | ND  | ND  | ND     | ND  | ND |
| M:0-15d  | ND | ND     | ND  | ND  | ND     | ND  | ND |
| 15-30d   | ND | ND     | ND  | ND  | ND     | ND  | ND |
| F:15-30d | ND | ND     | ND  | ND  | ND     | ND  | ND |
| M:15-30d | ND | ND     | ND  | ND  | ND     | ND  | ND |
| 1-6m     | ND | ND     | ND  | ND  | ND     | ND  | ND |
| F:1-6m   | ND | ND     | ND  | ND  | ND     | ND  | ND |
| M:1-6m   | ND | ND     | ND  | ND  | ND     | ND  | ND |
| 6-12m    | ND | ND     | ND  | ND  | ND     | ND  | ND |
| F:6-12m  | ND | ND     | ND  | ND  | ND     | ND  | ND |
| M:6-12m  | ND | ND     | ND  | ND  | ND     | ND  | ND |
| 1-16y    | 67 | 62     | 83  | 179 | 169    | 186 | 87 |
| F:1-16y  | 85 | 80     | 105 | 185 | 174    | 188 | 39 |
| M:1-16y  | 65 | 62     | 85  | 164 | 155    | 168 | 47 |
| F        | 85 | 80     | 105 | 185 | 174    | 188 | 39 |
| M        | 65 | 62     | 85  | 164 | 155    | 168 | 47 |
| all      | 67 | 62     | 81  | 179 | 170    | 186 | 87 |



Table S17: Antithrombin: Lower limit (LL, column 2) or upper limit (UL, column 5) of the reference intervals, with 90% confidence interval (columns 3 and 4 for LL and columns 6 and 7 for UL) for each subgroup investigated. d=days, m=months, y=years, F=females, M=males, N=number of subjects in that specific group after outlier exclusion.

| group    | LL | 90% CI |    | UL  | 90% CI |     | N   |
|----------|----|--------|----|-----|--------|-----|-----|
| 0-15d    | 34 | 29     | 39 | 87  | 79     | 92  | 138 |
| F:0-15d  | 33 | 30     | 42 | 83  | 76     | 86  | 54  |
| M:0-15d  | 38 | 37     | 41 | 89  | 79     | 94  | 83  |
| 15-30d   | 51 | 49     | 53 | 100 | 92     | 105 | 125 |
| F:15-30d | 53 | 53     | 55 | 104 | 95     | 107 | 64  |
| M:15-30d | 44 | 38     | 52 | 92  | 89     | 93  | 62  |
| 1-6m     | 60 | 57     | 64 | 122 | 117    | 127 | 131 |
| F:1-6m   | 57 | 54     | 62 | 124 | 117    | 127 | 60  |
| M:1-6m   | 65 | 62     | 71 | 122 | 114    | 128 | 71  |
| 6-12m    | 76 | 73     | 82 | 133 | 130    | 135 | 108 |
| F:6-12m  | 74 | 72     | 82 | 135 | 132    | 136 | 64  |
| M:6-12m  | 82 | 80     | 88 | 124 | 118    | 128 | 44  |
| 1-16y    | 88 | 87     | 90 | 122 | 119    | 124 | 138 |
| F:1-16y  | 90 | 88     | 95 | 124 | 121    | 126 | 66  |
| M:1-16y  | 87 | 86     | 89 | 118 | 114    | 119 | 72  |
| F        | 44 | 40     | 49 | 128 | 124    | 132 | 317 |
| M        | 41 | 38     | 45 | 118 | 116    | 121 | 336 |
| all      | 43 | 40     | 45 | 124 | 120    | 128 | 653 |

Table S18: Protein C: Lower limit (LL, column 2) or upper limit (UL, column 5) of the reference intervals, with 90% confidence interval (columns 3 and 4 for LL and columns 6 and 7 for UL) for each subgroup investigated. d=days, m=months, y=years, F=females, M=males, N=number of subjects in that specific group after outlier exclusion.

| group    | LL | 90% CI |    | UL  | 90% CI |     | N   |
|----------|----|--------|----|-----|--------|-----|-----|
| 0-15d    | 20 | 20     | 21 | 53  | 49     | 55  | 63  |
| F:0-15d  | 22 | 22     | 26 | 52  | 45     | 53  | 22  |
| M:0-15d  | 20 | 20     | 22 | 53  | 48     | 55  | 41  |
| 15-30d   | 25 | 23     | 27 | 65  | 63     | 67  | 111 |
| F:15-30d | 27 | 25     | 30 | 63  | 59     | 63  | 62  |
| M:15-30d | 23 | 21     | 26 | 66  | 58     | 68  | 47  |
| 1-6m     | 22 | 20     | 26 | 74  | 69     | 76  | 112 |
| F:1-6m   | 20 | 20     | 24 | 70  | 62     | 75  | 56  |
| M:1-6m   | 26 | 26     | 29 | 75  | 71     | 77  | 56  |
| 6-12m    | 48 | 42     | 58 | 116 | 108    | 120 | 67  |
| F:6-12m  | 61 | 60     | 64 | 111 | 103    | 113 | 44  |
| M:6-12m  | 47 | 45     | 58 | 118 | 101    | 121 | 21  |
| 1-16y    | 61 | 58     | 65 | 119 | 113    | 121 | 134 |
| F:1-16y  | 59 | 57     | 65 | 124 | 118    | 127 | 63  |
| M:1-16y  | 64 | 62     | 68 | 114 | 109    | 119 | 72  |
| F        | 24 | 22     | 27 | 116 | 109    | 122 | 257 |
| M        | 23 | 21     | 26 | 109 | 105    | 113 | 240 |
| all      | 24 | 21     | 26 | 113 | 108    | 118 | 498 |

Table S19: Protein S: Lower limit (LL, column 2) or upper limit (UL, column 5) of the reference intervals, with 90% confidence interval (columns 3 and 4 for LL and columns 6 and 7 for UL) for each subgroup investigated. d=days, m=months, y=years, F=females, M=males, N=number of subjects in that specific group after outlier exclusion.

| group    | LL | 90% CI |    | UL  | 90% CI |     | N   |
|----------|----|--------|----|-----|--------|-----|-----|
| 0-15d    | 33 | 31     | 36 | 78  | 73     | 80  | 61  |
| F:0-15d  | 35 | 35     | 41 | 78  | 72     | 79  | 21  |
| M:0-15d  | 32 | 31     | 36 | 72  | 67     | 73  | 39  |
| 15-30d   | 40 | 36     | 44 | 104 | 92     | 110 | 112 |
| F:15-30d | 38 | 35     | 45 | 100 | 91     | 106 | 66  |
| M:15-30d | 44 | 43     | 48 | 100 | 84     | 108 | 45  |
| 1-6m     | 49 | 46     | 53 | 119 | 113    | 129 | 114 |
| F:1-6m   | 47 | 44     | 51 | 133 | 116    | 139 | 59  |
| M:1-6m   | 56 | 52     | 64 | 114 | 107    | 116 | 56  |
| 6-12m    | 62 | 59     | 67 | 138 | 128    | 143 | 70  |
| F:6-12m  | 67 | 65     | 73 | 132 | 121    | 135 | 45  |
| M:6-12m  | 59 | 58     | 65 | 127 | 119    | 128 | 23  |
| 1-16y    | 60 | 56     | 65 | 119 | 112    | 125 | 136 |
| F:1-16y  | 59 | 55     | 67 | 122 | 113    | 128 | 64  |
| M:1-16y  | 61 | 56     | 67 | 112 | 106    | 115 | 71  |
| F        | 41 | 37     | 45 | 126 | 117    | 132 | 257 |
| M        | 39 | 36     | 42 | 119 | 114    | 125 | 242 |
| all      | 40 | 37     | 43 | 121 | 116    | 126 | 498 |

Table S20: VWF:Ag: Lower limit (LL, column 2) or upper limit (UL, column 5) of the reference intervals, with 90% confidence interval (columns 3 and 4 for LL and columns 6 and 7 for UL) for each subgroup investigated. d=days, m=months, y=years, F=females, M=males, N=number of subjects in that specific group after outlier exclusion.

| group    | LL  | 90% CI |     | UL  | 90% CI |     | N   |
|----------|-----|--------|-----|-----|--------|-----|-----|
| 0-15d    | 86  | 82     | 103 | 219 | 206    | 226 | 51  |
| F:0-15d  | 95  | 91     | 129 | 209 | 179    | 212 | 20  |
| M:0-15d  | 68  | 65     | 96  | 266 | 212    | 271 | 34  |
| 15-30d   | 96  | 93     | 134 | 226 | 215    | 227 | 19  |
| F:15-30d | 139 | 139    | 164 | 194 | 160    | 195 | 4   |
| M:15-30d | 96  | 93     | 134 | 226 | 216    | 227 | 15  |
| 1-6m     | 78  | 69     | 86  | 266 | 244    | 274 | 100 |
| F:1-6m   | 80  | 78     | 89  | 301 | 285    | 303 | 53  |
| M:1-6m   | 75  | 66     | 94  | 252 | 219    | 259 | 50  |
| 6-12m    | 58  | 56     | 67  | 168 | 148    | 171 | 44  |
| F:6-12m  | 66  | 66     | 70  | 171 | 138    | 172 | 14  |
| M:6-12m  | 58  | 56     | 73  | 152 | 129    | 156 | 30  |
| 1-16y    | 54  | 51     | 59  | 169 | 152    | 180 | 123 |
| F:1-16y  | 52  | 49     | 61  | 176 | 154    | 185 | 58  |
| M:1-16y  | 56  | 55     | 62  | 160 | 144    | 174 | 65  |
| F        | 59  | 52     | 65  | 252 | 226    | 267 | 148 |
| M        | 59  | 57     | 65  | 220 | 213    | 225 | 191 |
| all      | 60  | 57     | 64  | 243 | 225    | 259 | 343 |

Table S21: VWF:RCO: Lower limit (LL, column 2) or upper limit (UL, column 5) of the reference intervals, with 90% confidence interval (columns 3 and 4 for LL and columns 6 and 7 for UL) for each subgroup investigated. d=days, m=months, y=years, F=females, M=males, N=number of subjects in that specific group after outlier exclusion.

| id       | LL | 90% CI |    | UL  | 90% CI |     | I   |
|----------|----|--------|----|-----|--------|-----|-----|
| 0-15d    | 49 | 48     | 54 | 138 | 117    | 141 | 39  |
| F:0-15d  | 53 | 52     | 59 | 176 | 136    | 181 | 16  |
| M:0-15d  | 49 | 48     | 54 | 109 | 95     | 111 | 24  |
| 15-30d   | 42 | 42     | 49 | 185 | 132    | 187 | 12  |
| F:15-30d | 43 | 43     | 80 | 89  | 80     | 89  | 3   |
| M:15-30d | 42 | 42     | 63 | 185 | 134    | 187 | 9   |
| 1-6m     | 52 | 51     | 55 | 177 | 164    | 180 | 57  |
| F:1-6m   | 52 | 51     | 57 | 169 | 127    | 175 | 28  |
| M:1-6m   | 52 | 51     | 57 | 179 | 166    | 181 | 29  |
| 6-12m    | 43 | 42     | 51 | 123 | 93     | 126 | 22  |
| F:6-12m  | 42 | 42     | 51 | 124 | 87     | 126 | 8   |
| M:6-12m  | 52 | 51     | 59 | 88  | 82     | 88  | 13  |
| 1-16y    | 37 | 37     | 40 | 95  | 91     | 97  | 72  |
| F:1-16y  | 37 | 37     | 40 | 113 | 89     | 116 | 33  |
| M:1-16y  | 40 | 37     | 46 | 96  | 91     | 97  | 41  |
| F        | 38 | 37     | 42 | 124 | 116    | 126 | 82  |
| M        | 43 | 39     | 47 | 112 | 104    | 116 | 107 |
| all      | 40 | 38     | 43 | 119 | 112    | 123 | 189 |

Table S22: PTT-LA: Lower limit (LL, column 2) or upper limit (UL, column 5) of the reference intervals, with 90% confidence interval (columns 3 and 4 for LL and columns 6 and 7 for UL) for each subgroup investigated. d=days, m=months, y=years, F=females, M=males, N=number of subjects in that specific group after outlier exclusion.

| group    | LL | 90% CI |    | UL | 90% CI |    | N   |
|----------|----|--------|----|----|--------|----|-----|
| 0-15d    | 35 | 34     | 37 | 54 | 50     | 56 | 53  |
| F:0-15d  | 31 | 31     | 38 | 50 | 47     | 51 | 18  |
| M:0-15d  | 35 | 34     | 37 | 55 | 50     | 56 | 36  |
| 15-30d   | 34 | 33     | 36 | 50 | 48     | 51 | 76  |
| F:15-30d | 33 | 33     | 37 | 49 | 48     | 49 | 29  |
| M:15-30d | 34 | 33     | 37 | 50 | 48     | 51 | 47  |
| 1-6m     | 32 | 30     | 33 | 50 | 48     | 51 | 108 |
| F:1-6m   | 32 | 31     | 34 | 47 | 45     | 48 | 51  |
| M:1-6m   | 33 | 33     | 35 | 51 | 49     | 51 | 55  |
| 6-12m    | 32 | 31     | 34 | 47 | 45     | 47 | 78  |
| F:6-12m  | 32 | 31     | 35 | 46 | 44     | 47 | 42  |
| M:6-12m  | 32 | 31     | 35 | 46 | 43     | 47 | 35  |
| 1-16y    | 32 | 31     | 33 | 46 | 45     | 47 | 119 |
| F:1-16y  | 32 | 31     | 34 | 46 | 44     | 47 | 56  |
| M:1-16y  | 32 | 31     | 33 | 46 | 45     | 47 | 63  |
| F        | 31 | 30     | 33 | 48 | 47     | 49 | 200 |
| M        | 32 | 31     | 33 | 50 | 49     | 51 | 237 |
| all      | 32 | 31     | 33 | 49 | 48     | 50 | 438 |

Table S23: PTT-LA ratio: Lower limit (LL, column 2) or upper limit (UL, column 5) of the reference intervals, with 90% confidence interval (columns 3 and 4 for LL and columns 6 and 7 for UL) for each subgroup investigated. d=days, m=months, y=years, F=females, M=males, N=number of subjects in that specific group after outlier exclusion.

| group    | LL   | 90% CI |      | UL   | 90% CI |      | N   |
|----------|------|--------|------|------|--------|------|-----|
| 0-15d    | 0.86 | 0.85   | 0.91 | 1.33 | 1.24   | 1.39 | 53  |
| F:0-15d  | 0.78 | 0.76   | 0.95 | 1.25 | 1.18   | 1.26 | 18  |
| M:0-15d  | 0.86 | 0.85   | 0.96 | 1.35 | 1.24   | 1.39 | 36  |
| 15-30d   | 0.83 | 0.81   | 0.90 | 1.23 | 1.20   | 1.26 | 76  |
| F:15-30d | 0.82 | 0.81   | 0.96 | 1.21 | 1.19   | 1.22 | 29  |
| M:15-30d | 0.84 | 0.81   | 0.92 | 1.24 | 1.19   | 1.26 | 47  |
| 1-6m     | 0.79 | 0.76   | 0.82 | 1.24 | 1.20   | 1.26 | 108 |
| F:1-6m   | 0.79 | 0.77   | 0.84 | 1.17 | 1.12   | 1.19 | 51  |
| M:1-6m   | 0.82 | 0.81   | 0.86 | 1.25 | 1.22   | 1.27 | 55  |
| 6-12m    | 0.79 | 0.77   | 0.84 | 1.16 | 1.11   | 1.17 | 78  |
| F:6-12m  | 0.79 | 0.77   | 0.85 | 1.15 | 1.09   | 1.17 | 42  |
| M:6-12m  | 0.79 | 0.77   | 0.87 | 1.14 | 1.05   | 1.16 | 35  |
| 1-16y    | 0.79 | 0.77   | 0.82 | 1.14 | 1.11   | 1.16 | 119 |
| F:1-16y  | 0.79 | 0.78   | 0.84 | 1.14 | 1.10   | 1.15 | 56  |
| M:1-16y  | 0.79 | 0.76   | 0.82 | 1.15 | 1.11   | 1.16 | 63  |
| F        | 0.78 | 0.75   | 0.81 | 1.20 | 1.18   | 1.22 | 200 |
| M        | 0.80 | 0.78   | 0.82 | 1.24 | 1.21   | 1.26 | 237 |
| all      | 0.79 | 0.77   | 0.81 | 1.22 | 1.20   | 1.25 | 438 |

Table S24: DRVV Screening: Lower limit (LL, column 2) or upper limit (UL, column 5) of the reference intervals, with 90% confidence interval (columns 3 and 4 for LL and columns 6 and 7 for UL) for each subgroup investigated. d=days, m=months, y=years, F=females, M=males, N=number of subjects in that specific group after outlier exclusion.

| group    | LL | 90% CI |    | UL | 90% CI |    | N   |
|----------|----|--------|----|----|--------|----|-----|
| 0-15d    | 23 | 23     | 25 | 41 | 39     | 42 | 39  |
| F:0-15d  | 23 | 23     | 25 | 35 | 33     | 35 | 15  |
| M:0-15d  | 25 | 25     | 30 | 44 | 40     | 45 | 25  |
| 15-30d   | 24 | 23     | 26 | 40 | 38     | 40 | 74  |
| F:15-30d | 26 | 26     | 28 | 39 | 36     | 39 | 28  |
| M:15-30d | 24 | 23     | 26 | 40 | 37     | 41 | 46  |
| 1-6m     | 24 | 23     | 25 | 37 | 36     | 38 | 119 |
| F:1-6m   | 24 | 23     | 25 | 37 | 36     | 38 | 58  |
| M:1-6m   | 24 | 23     | 25 | 37 | 35     | 37 | 60  |
| 6-12m    | 28 | 27     | 29 | 45 | 43     | 45 | 79  |
| F:6-12m  | 28 | 27     | 29 | 45 | 40     | 45 | 48  |
| M:6-12m  | 28 | 28     | 30 | 44 | 42     | 44 | 31  |
| 1-16y    | 29 | 28     | 30 | 40 | 39     | 41 | 119 |
| F:1-16y  | 29 | 29     | 30 | 41 | 39     | 41 | 56  |
| M:1-16y  | 28 | 28     | 30 | 40 | 38     | 40 | 63  |
| F        | 25 | 24     | 25 | 40 | 39     | 41 | 205 |
| M        | 25 | 24     | 26 | 42 | 41     | 42 | 230 |
| all      | 25 | 24     | 25 | 41 | 40     | 42 | 436 |



Table S25: DRVV Screening ratio: Lower limit (LL, column 2) or upper limit (UL, column 5) of the reference intervals, with 90% confidence interval (columns 3 and 4 for LL and columns 6 and 7 for UL) for each subgroup investigated. d=days, m=months, y=years, F=females, M=males, N=number of subjects in that specific group after outlier exclusion.

| group    | LL   | 90% CI |      | UL   | 90% CI |      | N   |
|----------|------|--------|------|------|--------|------|-----|
| 0-15d    | 0.73 | 0.72   | 0.78 | 1.29 | 1.22   | 1.31 | 39  |
| F:0-15d  | 0.73 | 0.72   | 0.79 | 1.10 | 1.03   | 1.10 | 15  |
| M:0-15d  | 0.79 | 0.78   | 0.86 | 1.38 | 1.25   | 1.40 | 25  |
| 15-30d   | 0.76 | 0.73   | 0.81 | 1.24 | 1.19   | 1.26 | 74  |
| F:15-30d | 0.81 | 0.81   | 0.86 | 1.21 | 1.14   | 1.23 | 28  |
| M:15-30d | 0.74 | 0.72   | 0.81 | 1.25 | 1.18   | 1.26 | 46  |
| 1-6m     | 0.75 | 0.72   | 0.78 | 1.16 | 1.13   | 1.19 | 119 |
| F:1-6m   | 0.74 | 0.73   | 0.78 | 1.16 | 1.11   | 1.18 | 58  |
| M:1-6m   | 0.75 | 0.72   | 0.79 | 1.14 | 1.09   | 1.15 | 60  |
| 6-12m    | 0.87 | 0.85   | 0.90 | 1.39 | 1.34   | 1.42 | 79  |
| F:6-12m  | 0.86 | 0.84   | 0.91 | 1.40 | 1.24   | 1.42 | 48  |
| M:6-12m  | 0.89 | 0.88   | 0.92 | 1.37 | 1.31   | 1.38 | 31  |
| 1-16y    | 0.90 | 0.89   | 0.93 | 1.26 | 1.22   | 1.29 | 119 |
| F:1-16y  | 0.92 | 0.91   | 0.94 | 1.28 | 1.22   | 1.30 | 56  |
| M:1-16y  | 0.89 | 0.88   | 0.93 | 1.24 | 1.20   | 1.25 | 63  |
| F        | 0.77 | 0.74   | 0.80 | 1.25 | 1.22   | 1.28 | 205 |
| M        | 0.78 | 0.75   | 0.81 | 1.31 | 1.27   | 1.33 | 230 |
| all      | 0.78 | 0.76   | 0.79 | 1.29 | 1.26   | 1.31 | 436 |

Table S26: APCR. Lower limit (LL, column 2) or upper limit (UL, column 5) of the reference intervals, with 90% confidence interval (columns 3 and 4 for LL and columns 6 and 7 for UL) for each subgroup investigated. d=days, m=months, y=years, F=females, M=males, N=number of subjects in that specific group after outlier exclusion.

| group    | LL  | 90% CI |     | UL  | 90% CI |     | N   |
|----------|-----|--------|-----|-----|--------|-----|-----|
| 0-15d    | 111 | 98     | 123 | 216 | 207    | 219 | 81  |
| F:0-15d  | 118 | 116    | 128 | 211 | 191    | 215 | 30  |
| M:0-15d  | 95  | 88     | 123 | 217 | 206    | 219 | 52  |
| 15-30d   | 106 | 103    | 113 | 174 | 168    | 176 | 74  |
| F:15-30d | 106 | 103    | 123 | 175 | 169    | 176 | 28  |
| M:15-30d | 107 | 106    | 114 | 167 | 160    | 169 | 46  |
| 1-6m     | 95  | 83     | 106 | 182 | 177    | 186 | 119 |
| F:1-6m   | 106 | 104    | 112 | 182 | 171    | 187 | 57  |
| M:1-6m   | 74  | 70     | 93  | 182 | 176    | 185 | 64  |
| 6-12m    | 115 | 113    | 120 | 177 | 170    | 179 | 74  |
| F:6-12m  | 120 | 119    | 125 | 177 | 166    | 179 | 44  |
| M:6-12m  | 113 | 112    | 119 | 190 | 171    | 194 | 31  |
| 1-16y    | 130 | 124    | 137 | 202 | 194    | 205 | 112 |
| F:1-16y  | 133 | 128    | 146 | 186 | 182    | 187 | 49  |
| M:1-16y  | 127 | 120    | 137 | 205 | 196    | 209 | 62  |
| F        | 112 | 107    | 115 | 191 | 185    | 200 | 211 |
| M        | 105 | 96     | 110 | 206 | 199    | 211 | 257 |
| all      | 107 | 101    | 111 | 202 | 197    | 207 | 471 |

Table S27: APCR ratio: Lower limit (LL, column 2) or upper limit (UL, column 5) of the reference intervals, with 90% confidence interval (columns 3 and 4 for LL and columns 6 and 7 for UL) for each subgroup investigated. d=days, m=months, y=years, F=females, M=males, N=number of subjects in that specific group after outlier exclusion.

| group    | LL   | 90% CI |      | UL   | 90% CI |      | N   |
|----------|------|--------|------|------|--------|------|-----|
| 0-15d    | 0.76 | 0.66   | 0.83 | 1.47 | 1.41   | 1.49 | 81  |
| F:0-15d  | 0.80 | 0.79   | 0.87 | 1.44 | 1.30   | 1.46 | 30  |
| M:0-15d  | 0.65 | 0.60   | 0.83 | 1.47 | 1.40   | 1.49 | 52  |
| 15-30d   | 0.72 | 0.70   | 0.77 | 1.18 | 1.14   | 1.19 | 74  |
| F:15-30d | 0.72 | 0.70   | 0.84 | 1.19 | 1.15   | 1.20 | 28  |
| M:15-30d | 0.73 | 0.72   | 0.78 | 1.14 | 1.09   | 1.15 | 46  |
| 1-6m     | 0.64 | 0.56   | 0.72 | 1.24 | 1.20   | 1.26 | 119 |
| F:1-6m   | 0.72 | 0.70   | 0.76 | 1.24 | 1.17   | 1.27 | 57  |
| M:1-6m   | 0.50 | 0.48   | 0.63 | 1.24 | 1.19   | 1.25 | 64  |
| 6-12m    | 0.78 | 0.77   | 0.81 | 1.20 | 1.16   | 1.21 | 74  |
| F:6-12m  | 0.82 | 0.81   | 0.84 | 1.20 | 1.13   | 1.22 | 44  |
| M:6-12m  | 0.77 | 0.76   | 0.81 | 1.29 | 1.16   | 1.32 | 31  |
| 1-16y    | 0.88 | 0.84   | 0.93 | 1.38 | 1.32   | 1.39 | 112 |
| F:1-16y  | 0.90 | 0.87   | 0.99 | 1.26 | 1.24   | 1.27 | 49  |
| M:1-16y  | 0.86 | 0.82   | 0.93 | 1.40 | 1.33   | 1.42 | 62  |
| F        | 0.76 | 0.73   | 0.78 | 1.29 | 1.25   | 1.35 | 211 |
| M        | 0.71 | 0.65   | 0.75 | 1.40 | 1.35   | 1.44 | 257 |
| all      | 0.73 | 0.68   | 0.75 | 1.37 | 1.34   | 1.41 | 471 |

Table S28: the RIs for adults in use in the laboratory

| <b>Factor (unit)</b> | <b>Normal range adult</b> | <b>Factor (unit)</b> | <b>Normal range adult</b> |
|----------------------|---------------------------|----------------------|---------------------------|
| PT (s)               | 11.5-14.5                 | Factor VIII (%)      | 52-200                    |
| aPTT (s)             | 26.3-40.3                 | Factor IX (%)        | 59-254                    |
| Fibrinogen (mg/dL)   | 200-400                   | Factor X (%)         | 53-122                    |
| D-Dimer (µg/mL)      | <0.50                     | Factor XI (%)        | 67-196                    |
| Anti-thrombin (%)    | 80-120                    | Factor XII (%)       | 60-150                    |
| Thrombin time (s)    | <21                       | Factor XIII (%)      | 60-150                    |
| Protein C (%)        | 70-130                    | VWF Ag (%)           | 55-120                    |
| Protein S (%)        | 74-120                    | VWF RCO (%)          | 40-120                    |
| Factor II (%)        | 78-138                    | APCR (s)             | >120                      |
| Factor V (%)         | 78-152                    | PTT LA (ratio)       | 0.80-1.20                 |
| Factor VII (%)       | 61-199                    | DRVV (ratio)         | <1.20                     |

**Figures S1:** Reference intervals for PT in seconds (A), aPTT in seconds (B), PTT-LA in seconds (C), DRVV Screening in seconds (D) and APCR in seconds (E) in the subjects subgrouped by sex and age. The horizontal segments represent the RIs, while the vertical segments indicate the limits of the 90% confidence interval of the RIs. For each class RIs are reported combining males and females (red) or, respectively, only in females (green) or males

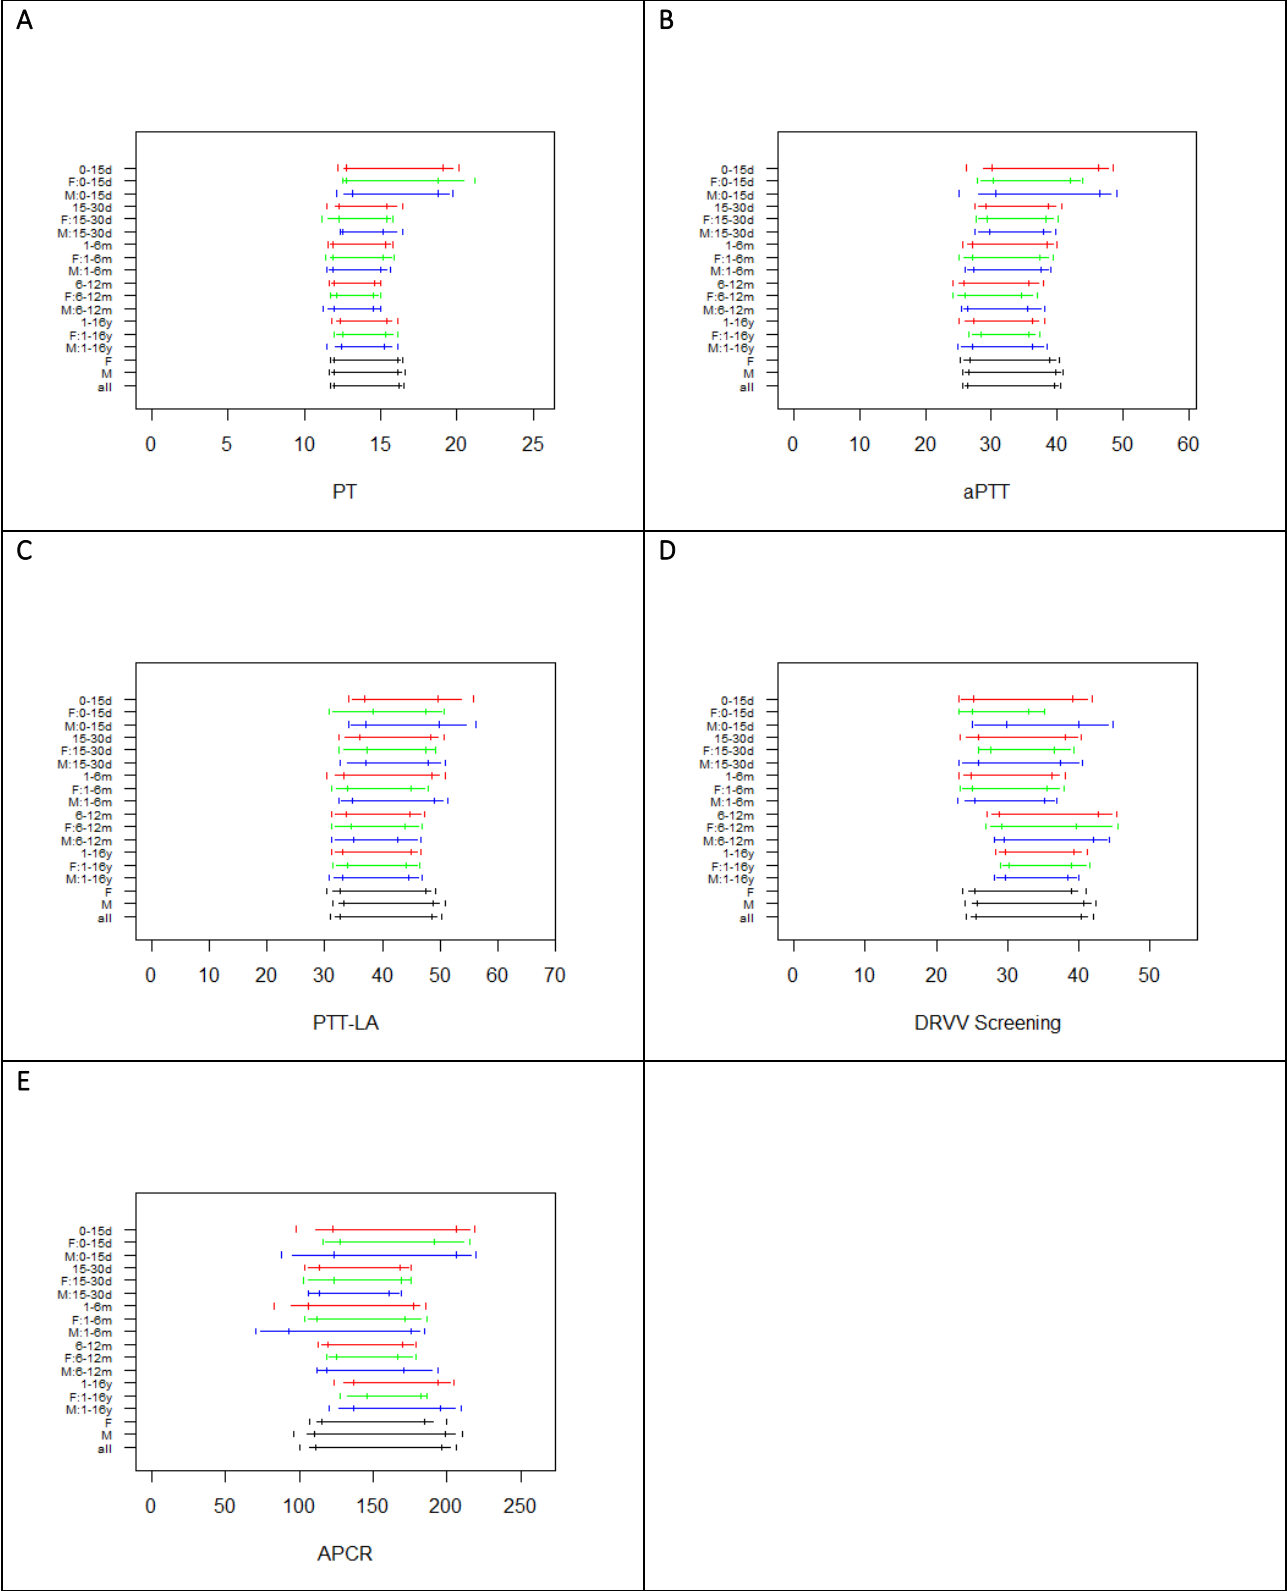

Supplement: s1 [file s1]
